# Supplementary material for: Unprecedented iron-assisted room temperature synthesis of AgCN using acetonitrile
Source: Royal Society of Chemistry journal article supplement (doi:10.1039/d4ra01790k), 2024-01-01
Supplement: d4ra01790k1.pdf [file d4ra01790k1.pdf]

## **Unprecedented iron-assisted room temperature synthesis of AgCN using acetonitrile**

Nand Kishor Gour<sup>a</sup>, Manash J. Baruah,<sup>b</sup> Biraj Das<sup>\*c</sup> and Mukesh Sharma<sup>\*d</sup>

<sup>a</sup>*Department of Chemical Sciences, Tezpur University, Napaam, Tezpur – 784028, Assam*

<sup>b</sup>*Department of Chemistry, D. C. B. Girls College, Jorhat, Assam, India, 785001*

<sup>c</sup>*Department of Chemistry, D. D. R. College, Chabua, Dibrugarh, Assam, India, 786184*

<sup>d</sup>*Department of Chemistry, Suren Das College, Hajo, Kamrup, Assam, India, 781102*

## Experimental Section

### Materials Used

Fe(NO<sub>3</sub>)<sub>3</sub>, FeSO<sub>4</sub>·7H<sub>2</sub>O and AgNO<sub>3</sub> were purchased from E-Merck. HPLC-grade CH<sub>3</sub>CN was purchased from E-Merck and was used in the synthesis of AgCN. H<sub>2</sub>O<sub>2</sub> (30% (w/w)) was used as received from Merck. The commercially available AgCN was procured from Sigma-Aldrich.

### Physical Measurements

The Fourier-transform infrared spectroscopy spectrum (FTIR) was recorded in the mid-IR range of 450–4000 cm<sup>-1</sup> in a Frontier-MIR-FIR from Perkin-Elmer. Powder X-ray diffraction (PXRD) measurement was recorded in BRUKER AXS, D8 FOCUS instrument in a low angle measurement from 2θ values of 10–80°. The electronic absorption spectra (UV-Vis) were measured using a Hitachi U-3400 spectrophotometer.

### Computational Details

The electronic structures of all species involved in Figure 3 are optimized using the ωB97XD density functional<sup>1</sup> method. We utilized 6-311++G(d,p) basis set for all the elements except Ag. Considering the strong relativistic effect of Ag-atom, we have employed the Los Alamos LanL2DZ basis set with an effective core potential<sup>2</sup> for Ag atom only. Furthermore, frequency calculations are performed for all optimized species using the same level of theory. The cartesian coordinates of all species are given in Table S1. All the stationary points have been characterized with real and positive vibrational frequency values, while the transition state has been characterized by only one imaginary frequency value. Harmonic vibrational frequencies of all species are given in Table S2. Intrinsic reaction coordinate (IRC)<sup>3</sup> calculation has also been performed to ascertain the minimum energy pathways (MEP) linking the reactant and product-like structures through the transition state along a reaction coordinate. All the electronic calculations are performed using Gaussian 09 program package.<sup>4</sup>

### **Procedure of the catalytic degradation of MB dye**

The degradation of methylene blue (MB) dye commenced by employing a standard solution with a molar concentration of  $1 \times 10^{-5}$  M, 10 mg of the catalyst and 100  $\mu$ L of 2 mM solution of sodium borohydride. The progression of the reaction was assessed through UV-vis spectrophotometric analysis, with samples collected from the reaction vessel at 3-minute intervals. A similar methodology was employed utilizing commercially available AgCN as the catalyst. Due to the observed lower activity of the commercially available AgCN compared to the synthesized counterpart, UV-Vis data interpretation necessitated sample collection every 8 minutes.

**Table S1** Cartesian coordinates of all species obtained at  $\omega$ B97XD/6-311++G(d,p)/LANL2DZ level of theory.

**FeO<sub>2</sub> (I)**

| Z  | X            | Y            | Z           |
|----|--------------|--------------|-------------|
| 26 | 0.000000000  | -0.606968000 | 0.000000000 |
| 8  | 0.676957000  | 0.986457000  | 0.000000000 |
| 8  | -0.676957000 | 0.986188000  | 0.000000000 |

**IM**

| Z  | X            | Y            | Z            |
|----|--------------|--------------|--------------|
| 26 | 0.661063000  | -0.000002000 | -0.009844000 |
| 8  | 1.172596000  | 1.407776000  | 0.324804000  |
| 8  | 1.172511000  | -1.407824000 | 0.324760000  |
| 6  | -2.440751000 | 0.000006000  | 0.630778000  |
| 1  | -2.383146000 | -0.886346000 | 1.263261000  |
| 1  | -3.376341000 | -0.000251000 | 0.069419000  |
| 1  | -2.383411000 | 0.886650000  | 1.262883000  |
| 6  | -1.312394000 | 0.000006000  | -0.304625000 |
| 7  | -0.755246000 | 0.000044000  | -1.356150000 |

**TS**

| <b>Z</b> | <b>X</b>     | <b>Y</b>     | <b>Z</b>     |
|----------|--------------|--------------|--------------|
| 26       | 0.792328000  | 0.060917000  | -0.028359000 |
| 8        | 0.553966000  | 1.578082000  | -0.224556000 |
| 8        | 1.893388000  | -0.833580000 | 0.560631000  |
| 6        | -2.728120000 | 0.161879000  | 0.471907000  |
| 1        | -2.718907000 | -0.101410000 | 1.530014000  |
| 1        | -3.648109000 | -0.198652000 | 0.008082000  |
| 1        | -2.656144000 | 1.244948000  | 0.362054000  |
| 6        | -1.593667000 | -0.447569000 | -0.191686000 |
| 7        | -0.746496000 | -0.967227000 | -0.790392000 |

**II**

| <b>Z</b> | <b>X</b>     | <b>Y</b>     | <b>Z</b>     |
|----------|--------------|--------------|--------------|
| 26       | -0.405374000 | 0.150239000  | -0.021582000 |
| 8        | -1.924349000 | -0.659094000 | -0.589250000 |
| 8        | -2.065936000 | -0.045938000 | 0.681784000  |
| 6        | 2.753105000  | -0.703881000 | 0.135255000  |
| 1        | 2.796470000  | -1.187772000 | 1.114913000  |
| 1        | 3.611611000  | -0.031595000 | 0.025264000  |
| 1        | 2.814451000  | -1.495081000 | -0.617074000 |
| 6        | 1.455870000  | 0.029357000  | -0.005460000 |
| 7        | 1.140804000  | 1.213661000  | -0.211573000 |

### III

| Z  | X            | Y            | Z            |
|----|--------------|--------------|--------------|
| 26 | -0.157752000 | -0.079376000 | 0.125603000  |
| 8  | -1.917593000 | -0.315794000 | 0.527306000  |
| 8  | -1.515845000 | -0.843137000 | -0.714073000 |
| 6  | 0.006775000  | 1.831747000  | -0.176126000 |
| 1  | 0.506993000  | 1.986553000  | -1.138504000 |
| 1  | 0.629222000  | 2.278422000  | 0.609586000  |
| 1  | -0.990338000 | 2.281065000  | -0.185294000 |
| 6  | 1.795612000  | -0.378251000 | 0.005222000  |
| 7  | 2.944122000  | -0.561685000 | -0.004557000 |

### IV

| Z  | X            | Y            | Z            |
|----|--------------|--------------|--------------|
| 26 | -3.556246000 | -0.065954000 | -0.090360000 |
| 8  | -4.681971000 | -0.652277000 | 1.123690000  |
| 8  | -5.299095000 | -0.566310000 | -0.132902000 |
| 6  | -3.604158000 | 1.848286000  | -0.384179000 |
| 1  | -3.135605000 | 2.062413000  | -1.354386000 |
| 1  | -3.026776000 | 2.353287000  | 0.396850000  |
| 1  | -4.643409000 | 2.184339000  | -0.373076000 |
| 6  | -1.583630000 | -0.108566000 | -0.050258000 |
| 7  | -0.423992000 | -0.141277000 | -0.073712000 |
| 47 | 1.684161000  | -0.215199000 | -0.149727000 |
| 7  | 4.476956000  | 0.192611000  | 0.204137000  |

|   |             |              |              |
|---|-------------|--------------|--------------|
| 8 | 3.822935000 | 0.951521000  | 0.942084000  |
| 8 | 5.695135000 | 0.181893000  | 0.175054000  |
| 8 | 3.821572000 | -0.610894000 | -0.556576000 |

**V**

| <b>Z</b> | <b>X</b>     | <b>Y</b>     | <b>Z</b>     |
|----------|--------------|--------------|--------------|
| 26       | 1.401610000  | 0.042978000  | 0.116120000  |
| 8        | 3.081895000  | -0.405809000 | 0.165178000  |
| 8        | 2.749965000  | 0.194717000  | -1.000362000 |
| 6        | -0.502189000 | 0.273014000  | 0.809035000  |
| 1        | -0.933004000 | 0.963181000  | 1.536220000  |
| 1        | 0.210389000  | -0.398019000 | 1.388217000  |
| 1        | -0.123027000 | 0.951594000  | -0.033689000 |
| 7        | -2.645095000 | -0.030360000 | -0.167710000 |
| 8        | -1.476260000 | -0.650612000 | 0.337394000  |
| 8        | -3.466354000 | -0.814525000 | -0.505416000 |
| 8        | -2.647673000 | 1.168760000  | -0.195557000 |

**CH<sub>3</sub>CN**

| <b>Z</b> | <b>X</b>     | <b>Y</b>     | <b>Z</b>     |
|----------|--------------|--------------|--------------|
| 6        | -1.175342000 | 0.000000000  | 0.000003000  |
| 1        | -1.547487000 | 0.897918000  | 0.495287000  |
| 1        | -1.547486000 | -0.877905000 | 0.529953000  |
| 1        | -1.547495000 | -0.020016000 | -1.025252000 |
| 6        | 0.280614000  | 0.000001000  | -0.000001000 |
| 7        | 1.430119000  | 0.000000000  | 0.000000000  |

**AgNO<sub>3</sub>**

| <b>Z</b> | <b>X</b>     | <b>Y</b>     | <b>Z</b>     |
|----------|--------------|--------------|--------------|
| 47       | -1.067123000 | -0.000008000 | -0.000094000 |
| 7        | 1.652324000  | -0.000017000 | 0.000099000  |
| 8        | 0.983325000  | 1.086172000  | 0.000548000  |
| 8        | 2.856409000  | 0.000244000  | -0.000633000 |
| 8        | 0.983828000  | -1.086351000 | 0.000548000  |

**CH<sub>3</sub>NO<sub>3</sub>**

| <b>Z</b> | <b>X</b>     | <b>Y</b>     | <b>Z</b>     |
|----------|--------------|--------------|--------------|
| 6        | -1.754959000 | -0.001247000 | -0.000033000 |
| 1        | -2.517220000 | -0.777791000 | -0.000541000 |
| 1        | -1.836591000 | 0.616202000  | 0.894891000  |
| 1        | -1.836147000 | 0.616884000  | -0.894518000 |
| 7        | 0.613093000  | 0.046099000  | -0.000010000 |
| 8        | -0.531896000 | -0.743652000 | 0.000064000  |
| 8        | 1.620769000  | -0.591953000 | -0.000030000 |
| 8        | 0.464635000  | 1.239292000  | 0.000020000  |

**AgCN**

| <b>Z</b> | <b>X</b>    | <b>Y</b>    | <b>Z</b>     |
|----------|-------------|-------------|--------------|
| 47       | 0.000000000 | 0.000000000 | 0.582652000  |
| 7        | 0.000000000 | 0.000000000 | -2.640722000 |
| 6        | 0.000000000 | 0.000000000 | -1.483265000 |



**Table S2** Harmonic vibrational frequencies (in  $\text{cm}^{-1}$ ) of all species obtained at  $\omega\text{B97XD/6-311++G(d,p)/LANL2DZ}$  level of theory.

| Species                  | Frequencies (in $\text{cm}^{-1}$ ) |      |      |      |      |      |      |      |      |      |      |
|--------------------------|------------------------------------|------|------|------|------|------|------|------|------|------|------|
| $\text{FeO}_2$ (I)       | 731                                | 857  | 1098 |      |      |      |      |      |      |      |      |
| IM                       | 92                                 | 107  | 159  | 227  | 282  | 316  | 388  | 407  | 553  | 925  | 1047 |
|                          | 1064                               | 1064 | 1106 | 1404 | 1465 | 1473 | 2103 | 3071 | 3164 | 3165 |      |
| TS                       | 134 <i>i</i>                       | 44   | 77   | 179  | 205  | 276  | 308  | 380  | 453  | 925  | 1046 |
|                          | 1049                               | 1062 | 1101 | 1404 | 1458 | 1468 | 2301 | 3070 | 3161 | 3166 |      |
| II                       | 77                                 | 97   | 107  | 202  | 291  | 362  | 430  | 503  | 612  | 632  | 958  |
|                          | 988                                | 1022 | 1110 | 1375 | 1477 | 1479 | 1795 | 3021 | 3102 | 3112 |      |
| III                      | 82                                 | 118  | 140  | 154  | 170  | 276  | 363  | 384  | 474  | 541  | 619  |
|                          | 641                                | 729  | 1013 | 1169 | 1438 | 1451 | 2231 | 3004 | 3093 | 3118 |      |
| IV                       | 4                                  | 21   | 25   | 59   | 68   | 74   | 102  | 115  | 131  | 146  | 155  |
|                          | 171                                | 188  | 269  | 331  | 406  | 450  | 481  | 543  | 624  | 643  | 732  |
|                          | 735                                | 768  | 844  | 1022 | 1097 | 1180 | 1370 | 1434 | 1455 | 1579 | 2254 |
|                          | 3004                               | 3095 | 3134 |      |      |      |      |      |      |      |      |
| V                        | 142                                | 52   | 102  | 131  | 166  | 183  | 279  | 402  | 567  | 606  | 659  |
|                          | 700                                | 785  | 845  | 895  | 1001 | 1061 | 1083 | 1170 | 1353 | 1411 | 1565 |
|                          | 1672                               | 1802 | 2485 | 2651 | 3126 |      |      |      |      |      |      |
| $\text{CH}_3\text{CN}$   | 386                                | 386  | 940  | 1064 | 1064 | 1414 | 1479 | 1479 | 2401 | 3070 | 3155 |
|                          | 3155                               |      |      |      |      |      |      |      |      |      |      |
| $\text{AgNO}_3$          | 122                                | 178  | 261  | 728  | 773  | 838  | 1083 | 1290 | 1625 |      |      |
| $\text{CH}_3\text{NO}_3$ | 133                                | 210  | 358  | 607  | 705  | 796  | 918  | 1069 | 1177 | 1207 | 1375 |
|                          | 1475                               | 1479 | 1505 | 1769 | 3070 | 3162 | 3188 |      |      |      |      |
| $\text{AgCN}$            | 220                                | 220  | 393  | 2288 |      |      |      |      |      |      |      |

**Table S3** Total energy, Enthalpy and Gibb's free energy of all species obtained at  $\omega$ B97XD/6-311++G(d,p)/LANL2DZ level of theory. All values are in Hartree.

| <b>Species</b>                      | <b>E<sub>0</sub></b> | <b>H</b>     | <b>G</b>    |
|-------------------------------------|----------------------|--------------|-------------|
| <b>FeO<sub>2</sub> (I)</b>          | -1413.91341          | -1413.909444 | -1413.93899 |
| <b>CH<sub>3</sub>CN</b>             | -132.696571          | -132.692025  | -132.720577 |
| <b>IM</b>                           | -1546.746679         | -1546.738448 | -1546.77873 |
| <b>TS</b>                           | -1546.73966          | -1546.731475 | -1546.77258 |
| <b>II</b>                           | -1546.780715         | -1546.772398 | -1546.81381 |
| <b>III</b>                          | -1546.791687         | -1546.782512 | -1546.82543 |
| <b>IV</b>                           | -1972.911908         | -1972.895838 | -1972.9622  |
| <b>V</b>                            | -1734.063757         | -1734.054014 | -1734.09992 |
| <b>AgNO<sub>3</sub></b>             | -426.039935          | -426.034099  | -426.070174 |
| <b>CH<sub>3</sub>NO<sub>3</sub></b> | -320.127539          | -320.121705  | -320.155542 |
| <b>AgCN</b>                         | -238.572209          | -238.567528  | -238.597239 |

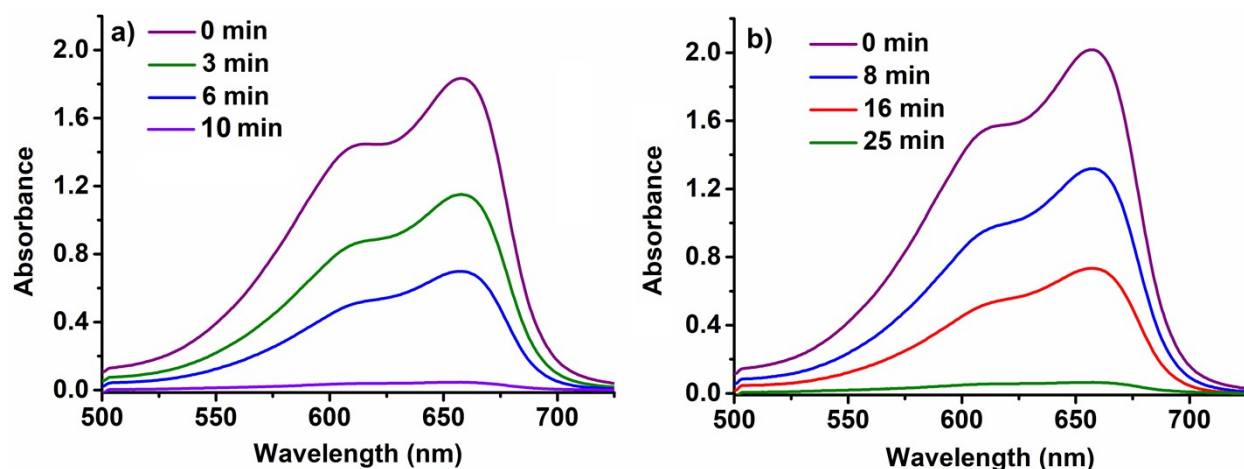

**Fig. S1** UV-Vis spectra for the degradation of methylene blue (MB) using (a) synthesized AgCN, and (b) Commercially available AgCN

## References

- 1 J. D. Chai, and M. Head-Gordon, *Phys. Chem. Chem. Phys.*, 2008, **10**, 6615–6620.
- 2 S. Chiodo, N. Russo, and E. Sicilia, *J. Chem. Phys.*, 2006, **125**, 104107.
- 3 C. Gonzalez, and H. B. Schlegel, *J. Chem. Phys.*, 1989, **90**, 2154-2161.
- 4 M. J. Frisch, G. W. Trucks, H. B. Schlegel, G. E. Scuseria, M. A. Robb, J. R. Cheeseman, G. Scalmani, V. Barone, B. Mennucci, and G. A. Petersson, et al. Gaussian 09, Revision D.01, Gaussian, Inc.:Wallingford, CT, 2009.
